# Supplementary material
Source: Springer Nature journal article supplement (https://www.springermedizin.de/resource/supplementary/12889_2012_5389_MOESM3_ESM.pdf/9495288)
Supplement: MOESM3 [file 9495288]

Mortality per 1000 live births

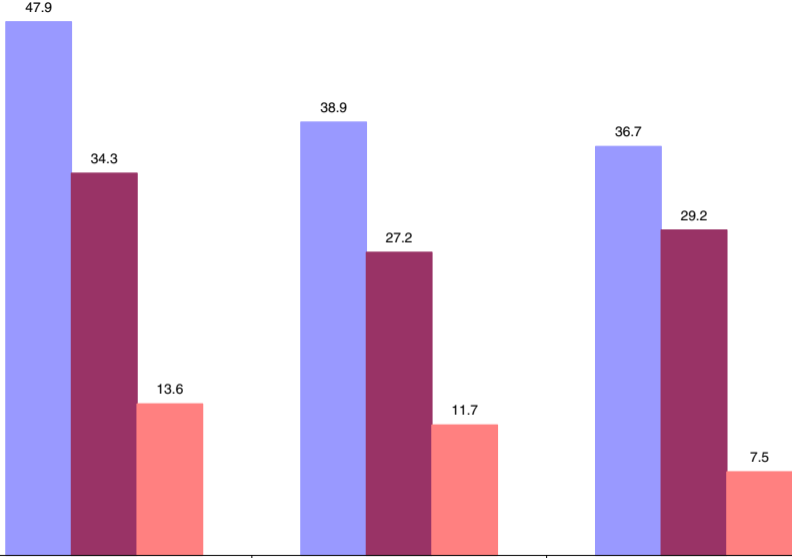

1995-2000

2001-2005

2006-2011

■ Neonatal Mortality ■ Early Neonatal Mortality ■ Late Neonatal Mortality
